# Supplementary material
Source: ML conference proceedings conference paper supplement (https://openaccess.thecvf.com/content/ICCV2023/html/Zhang_Toward_Multi-Granularity_Decision-Making_ICCV_2023_paper.html)
Supplement: Supplementary file 1 [file Zhang_Toward_Multi-Granularity_Decision-Making_ICCV_2023_supplemental.pdf]

# Toward Multi-Granularity Decision-Making: Explicit Visual Reasoning with Hierarchical Knowledge (Supplementary Materials)

Yifeng Zhang, Shi Chen, Qi Zhao

University of Minnesota

{zhan6987, chen4595}@umn.edu, qzhao@cs.umn.edu

The supplementary materials provide additional experimental results and implementation details of our proposed work:

1. Section 1 provides ablation analyses of the hyperparameters used in the proposed knowledge representation and reasoning model.
2. Section 2 presents details of the incorporation of knowledge graphs (*i.e.*, SKG, UKG, HCG) for non-NMN models (*i.e.*, MCAN [5], UnifER [3]).

## 1. Ablation Study on Hyperparameters

To enable a comprehensive understanding of our method, we perform ablation experiments to evaluate the effects of different hyperparameters for multi-layered hierarchical structure (HCG) and the hierarchical concept neural module networks (HCNMN). The model performance is evaluated on the GQA [4] dataset.

| $r_v \backslash r_c$ | 0.2   | 0.4          | 0.6   | 0.8   | 1.0   |
|----------------------|-------|--------------|-------|-------|-------|
| 0.2                  | 63.83 | 64.04        | 64.27 | 64.58 | 64.27 |
| 0.4                  | 64.02 | 64.26        | 64.59 | 64.72 | 64.76 |
| 0.6                  | 64.07 | <b>64.97</b> | 64.34 | 64.86 | 64.79 |
| 0.8                  | 64.17 | 64.23        | 64.59 | 64.65 | 64.74 |
| 1.0                  | 64.28 | 64.31        | 64.44 | 64.42 | 64.30 |

Table 1. Hyperparameter selections of  $r_v$  and  $r_c$  on the GQA validation set, based on the HCNMN model. The best result is highlighted in bold.

**Hyperparameters for Concept Properties.** The hyperparameters  $r_v$  and  $r_c$  are the weights that determine how concept properties are selected. Higher values enforce the extracted concepts being more unique (*i.e.*,  $r_c$ ) or relevant (*i.e.*,  $r_v$ ) to the dataset, respectively. Table 1 presents the results of our method with different combinations of  $r_v$  and  $r_c$ . Our method performs the best when  $r_v = 0.6$  and  $r_c = 0.4$ . The results indicate that both uniqueness and

relevance are important factors for extracting useful knowledge, and it is essential to maintain a reasonable balance between them.

| t       | 0.1   | 0.3          | 0.5   | 0.7   | 0.9   |
|---------|-------|--------------|-------|-------|-------|
| GQA Val | 64.26 | <b>64.97</b> | 64.87 | 64.25 | 63.98 |

Table 2. Hyperparameter selections of  $t$  on the GQA validation set, based on the HCNMN model. The best result is highlighted in bold.

**Hyperparameters for Inter-Layer Information Decay Rate.** The hyperparameter  $t$  controls the significance of the information that is propagated downwards across different granularity layers. A higher value enables models to emphasize more on the knowledge of more general concepts throughout the inter-layer propagation. Table 2 presents the results of our method with different  $t$ . Our method performs the best when  $t = 0.3$ , indicating the significance of taking into account the granularity of knowledge for decision-making. Additionally, it is also important to maintain a reasonable balance among knowledge of different granularity for visual reasoning.

| k       | 1     | 2     | 3            | 4     | 5     |
|---------|-------|-------|--------------|-------|-------|
| GQA Val | 62.89 | 64.14 | <b>64.97</b> | 64.39 | 63.78 |

Table 3. Hyperparameter selections of  $k$  on the GQA validation set, based on the HCNMN model. The best result is highlighted in bold.

**Hyperparameters for Graph Layers.** The hyperparameter  $k$  is the variable that controls the number of layers in our proposed hierarchical concept graph (HCG), and is relevant to the complexity of the knowledge representation. Table 3 presents the results of our method with different  $k$ . Our method performs the best result when  $k = 3$ , and thus applies this setting throughout our experiments in the main paper.

## 2. Implementation details of incorporating knowledge graphs for MCAN and UnifER

Several methods compared in the main paper, *i.e.*, MCAN [5] and UnifER [3], leverage attention mechanisms to combine implicit embeddings from knowledge sources and visual-linguistic inputs. On the other hand, our method emphasizes multi-granularity knowledge, and performs structured reasoning over a graph representation. Due to the discrepancies in knowledge representations, it is difficult to directly incorporate multi-granularity knowledge encoded in the multi-layered graph structure for implicit methods (*i.e.*, MCAN, UnifER) and fairly evaluate the roles of multi-granularity knowledge. For this, we make adjustments for the feature retrieval/encoding step of these methods in our study (see the main paper) by preprocessing graph-based knowledge representations (*i.e.*, SKG, UKG, HCG) into structure-aware embeddings.

Specifically, we leverage node2vec [2], a random walk-based approach, to perform the transformation from graph to embeddings through random walk generation and embedding creation. First, we randomly traverse the graph to create multiple “walks” (*i.e.*, paths consisting of multiple connected nodes) that encode the topology of the graph. In order to take into account the heterogeneity of HCG (*i.e.*, different types of edges), we generate two sets of walks that traverse through inter-layer and intra-layer edges, respectively. They implicitly encode the intra-layer and inter-layer relationships among concepts in different granularity. Next, those sequential “walks” are fed into an encoder-decoder framework [1] to create structure-aware knowledge embeddings for MCAN and UnifER.

## References

- [1] Kyunghyun Cho, Bart Van Merriënboer, Caglar Gulcehre, Dzmitry Bahdanau, Fethi Bougares, Holger Schwenk, and Yoshua Bengio. Learning phrase representations using rnn encoder-decoder for statistical machine translation. *arXiv preprint arXiv:1406.1078*, 2014. 2
- [2] Aditya Grover and Jure Leskovec. node2vec: Scalable feature learning for networks. In *Proceedings of the 22nd ACM SIGKDD international conference on Knowledge discovery and data mining*, pages 855–864, 2016. 2
- [3] Yangyang Guo, Liqiang Nie, Yongkang Wong, Yibing Liu, Zhiyong Cheng, and Mohan Kankanhalli. A unified end-to-end retriever-reader framework for knowledge-based vqa. In *Proceedings of the 30th ACM International Conference on Multimedia*, pages 2061–2069, 2022. 1, 2
- [4] Drew A Hudson and Christopher D Manning. GQA: A new dataset for real-world visual reasoning and compositional question answering. In *IEEE Conf. Comput. Vis. Pattern Recog.*, pages 6700–6709, 2019. 1
- [5] Zhou Yu, Jun Yu, Yuhao Cui, Dacheng Tao, and Qi Tian. Deep modular co-attention networks for visual question answering. In *Proceedings of the IEEE Conference on Computer Vision and Pattern Recognition (CVPR)*, pages 6281–6290, 2019. 1, 2
